# Supplementary material for: To unravel the connection between the non-equilibrium and equilibrium solvation dynamics of tryptophan: success and failure of the linear response theory of fluorescence Stokes shift
Source: Royal Society of Chemistry journal article supplement (doi:10.1039/d0ra01227k), 2020-01-01
Supplement: d0ra01227k1.pdf [file d0ra01227k1.pdf]

To Unravel Connection between Nonequilibrium and Equilibrium Solvation Dynamics of  
Tryptophan: Success and Failure of Linear Response Theory of Fluorescence Stokes Shift

Xiaofang Wang,<sup>a</sup> Jirui Guo,<sup>a</sup> Tanping Li,<sup>\*a</sup> Zhiyi Wei<sup>b</sup>

<sup>a</sup> School of Physics and Optoelectronic Engineering, Xidian University, Xi'an, 710071, People's  
Republic of China

<sup>b</sup> Beijing National Laboratory for Condensed Matter Physics, Institute of Physics, Chinese  
Academy of Sciences, Beijing 100190, China

\*Corresponding author: [tpli@xidian.edu.cn](mailto:tpli@xidian.edu.cn)

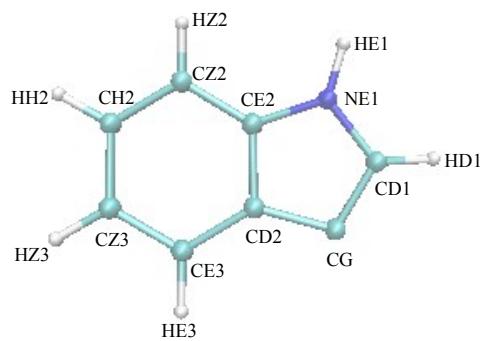

Figure S1: Indole atoms of tryptophan. The spheres in colors represent the carbon (cyan), nitrogen (blue) and hydrogen (white).

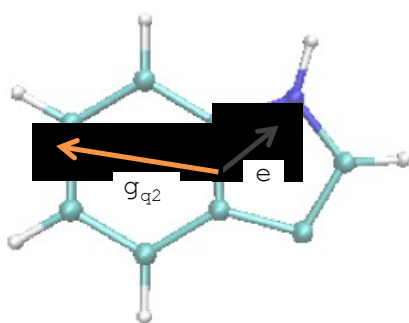

Figure S2: Dipole moment of indole for the state  $g_{q_2}$  and the excited state  $e$  (9.7D and 5.1D respectively) constructed from the partial charges described in Table 1.

Table 1. The simulation parameters for the initial state  $g$ ,  $g_{T_1}$ ,  $g_{q_1}$ ,  $g_{q_2}$  and the excited state ( $e$ ). Atomic charges of indole are listed. For all the MD simulations, the temperature is set as 298K except for the equilibrium simulation of the state  $g_{T_1}$ , in which the high temperature 353K is taken to acquire a broader configurational sampling.

|      | atomic charge |           |           |       |
|------|---------------|-----------|-----------|-------|
| atom | $g/g_{T_1}$   | $g_{q_1}$ | $g_{q_2}$ | $e$   |
| CG   | -0.14         | -0.095    | -0.44     | 0.01  |
| CD1  | -0.1          | -0.085    | -0.2      | -0.05 |
| HD1  | 0.1           | 0.1       | 0.1       | 0.1   |
| CD2  | 0             | -0.021    | 0.14      | -0.07 |
| NE1  | -0.05         | 0.001     | -0.39     | 0.12  |
| HE1  | 0.19          | 0.19      | 0.19      | 0.19  |
| CE2  | 0             | 0.003     | -0.02     | 0.01  |
| CE3  | -0.1          | -0.139    | 0.16      | -0.23 |
| HE3  | 0.1           | 0.1       | 0.1       | 0.1   |
| CZ2  | -0.1          | -0.139    | 0.16      | -0.23 |
| HZ2  | 0.1           | 0.1       | 0.1       | 0.1   |
| CZ3  | -0.1          | -0.097    | -0.12     | -0.09 |
| HZ3  | 0.1           | 0.1       | 0.1       | 0.1   |
| CH2  | -0.1          | -0.118    | 0.02      | -0.16 |
| HH2  | 0.1           | 0.1       | 0.1       | 0.1   |
